# Supplementary material for: Formation of a remarkably robust 2∶1 complex between β-cyclodextrin and a phenyl-substituted icosahedral carborane
Source: Royal Society of Chemistry journal article supplement (doi:10.1039/b209339a), 2002-01-01
Supplement: b209339a.doc [file b209339a.doc]

Formation of a remarkably robust 2:1 complex between ‑cyclodextrin and a phenyl-substituted icosahedral carborane

Christophe Frixa, Martin Scobie, Steven J. Black, Andrew S. Thompson and Michael D. Threadgill

**Additional information**

**Formation of complex 4.** Phenylcarborane **3** (200 mg, 910 mol) in propan-2-ol (20 cm3) was added to -cyclodextrin (2.27 g, 1.8 mmol) in water (250 cm3) and the mixture was stirred vigorously for 35 min. The solid was collected by filtration and was washed with hot water (*ca*. 90C) (250 cm3) before being dried (0.5 Torr, 60C, P2O5) for 24 h. The dry solid was then washed with hot toluene (*ca*. 100C) (100 cm3) and was dried to give **4** (1.80 g, 79%) as a white solid: mp >350C; max (KBr) /cm-1 3350 (br) (O-H), 2910 (C-H), 2580, 2560 (B-H); H ((CD3)2SO) 2.5 (10 H, m, 10  BH), 3.29 (28 H, m, cyclodextrin 14  2,4-H), 3.53 (14 H, m, cyclodextrin 14  5-H), 3.60 (42 H, m, cyclodextrin 14  3,6-H3), 4.44 (14 H, m, cyclodextrin 14  6-OH), 4.80 (14 H, br, cyclodextrin 14  1-H), 5.66 (14 H, d, *J* 2.0 Hz, cyclodextrin 14  3-OH), 5.71 (14 H, d, *J* 7.0 Hz, cyclodextrin 14  2-OH), 5.78 (1 H, br, carborane 2-H), 7.39 (2 H, *ca*. t, *J* 7 Hz, Ph 3,5-H2), 7.43 (1 H, *ca*. t, *J* 7 Hz, Ph 4-H), 7.55 (2 H, m, Ph 2,6-H2).
